# Supplementary material
Source: MDPI journal article supplement (https://www.mdpi.com/2072-4292/12/6/902)
Supplement: s1 [file s1]

# Supplementary Figures for “Can MERRA-2 reanalysis data reproduce the three-dimensional evolution characteristics of a typical dust process in east Asia? A case study of the dust event in May 2017”

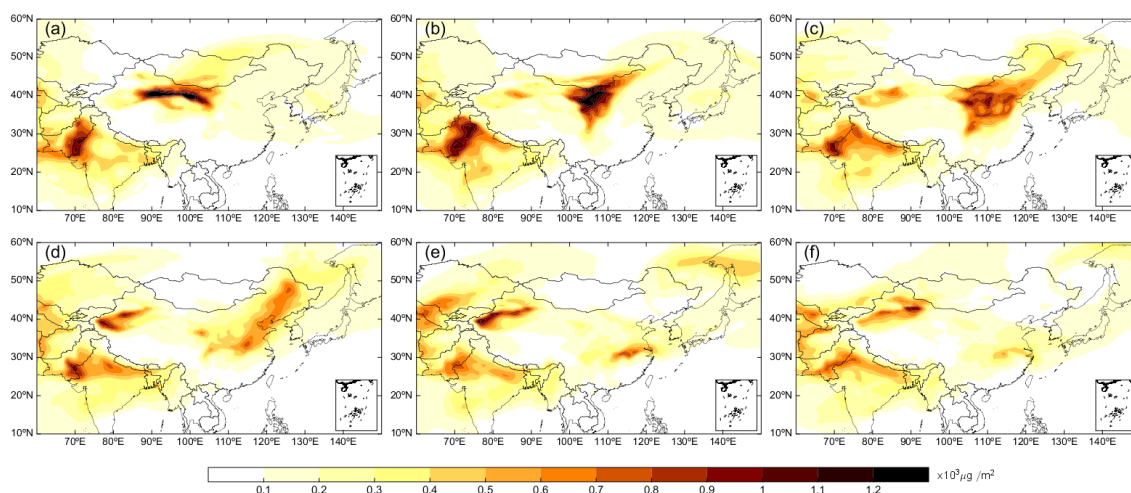

**Figure S1.** Spatial distribution of the surface mass concentration of dust on 2–7 May 2017. (sub-graph (a) to (f) respectively describe the surface mass concentration of dust on 2–7 May 2017)

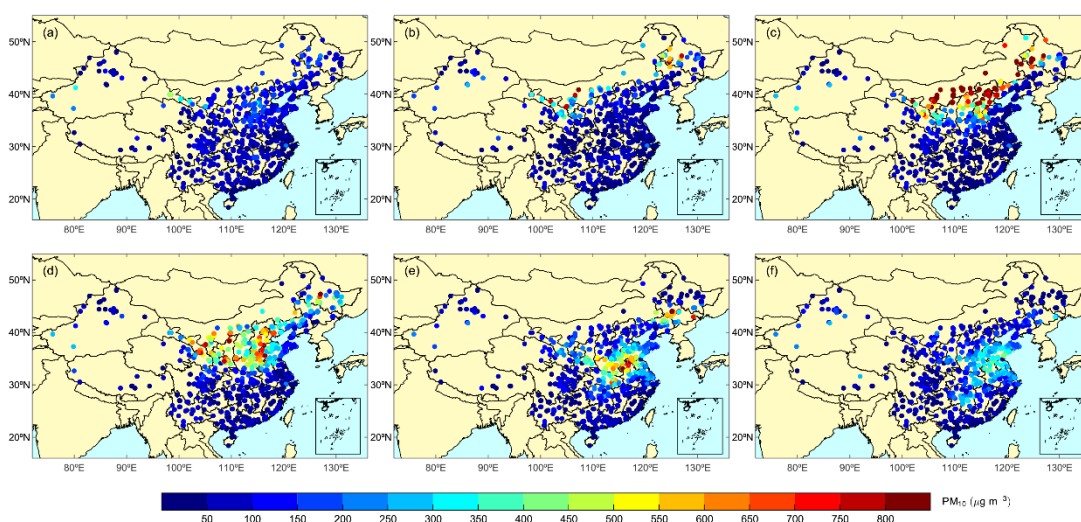

**Figure S2.** Daily average spatial distribution characteristics of  $\text{PM}_{10}$  on 2–7 May 2017 (Beijing time). (sub-graph (a) to (f) respectively describe daily average spatial distribution characteristics of  $\text{PM}_{10}$  on 2–7 May 2017)

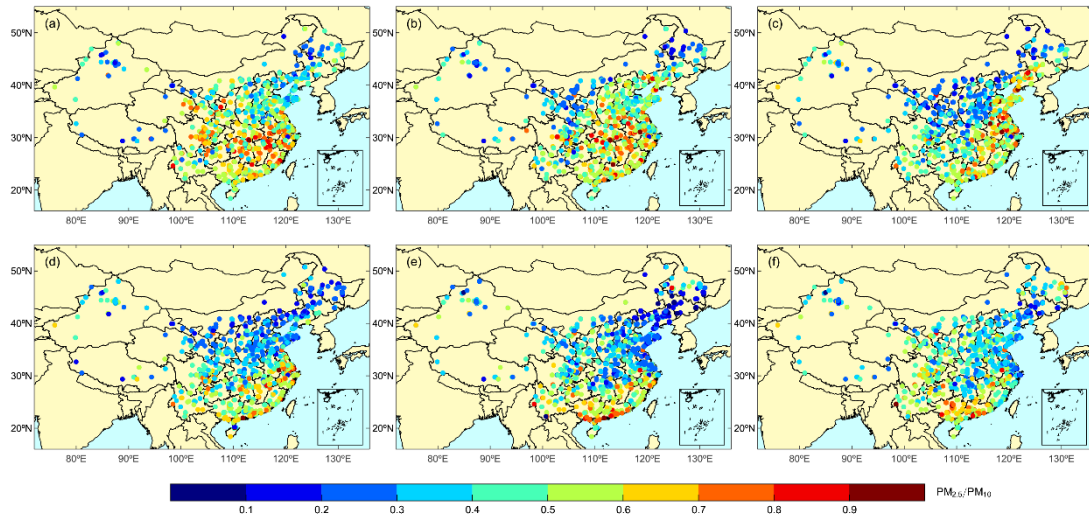

**Figure S3.** Daily average spatial distribution characteristics of  $PM_{2.5}/PM_{10}$  on 2–7 May 2017 (Beijing time). (sub-graph (a) to (f) respectively describe daily average spatial distribution characteristics of  $PM_{2.5}/PM_{10}$  on 2–7 May 2017)

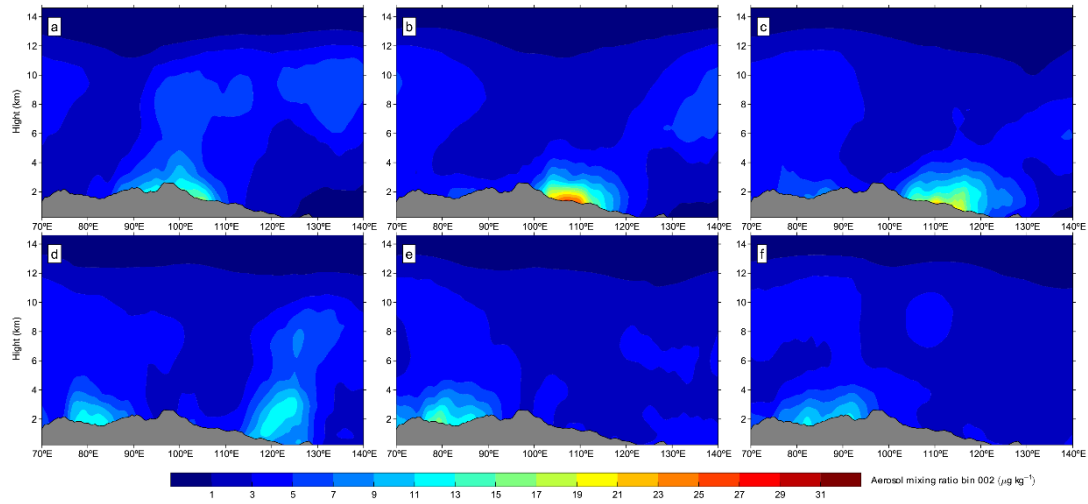

**Figure S4.** Vertical profile of dust aerosol mixing ratio of bin-001 accumulated in the atmosphere on a single day on 2–7 May 2017. (Beijing time). (sub-graph (a) to (f) respectively describe dust aerosol mixing ratio of bin-001 on 2–7 May 2017)

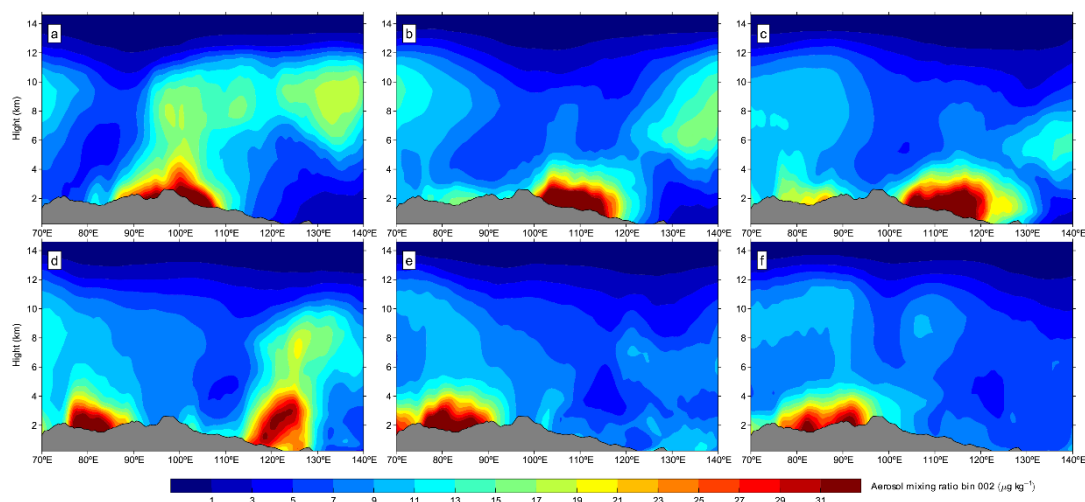

**Figure S5.** Vertical profile characteristics of dust aerosol mixing ratio of bin-002 accumulated in the atmosphere on a single day on 2–7 May 2017. (sub-graph (a) to (f) respectively describe dust aerosol mixing ratio of bin-002 on 2–7 May 2017)

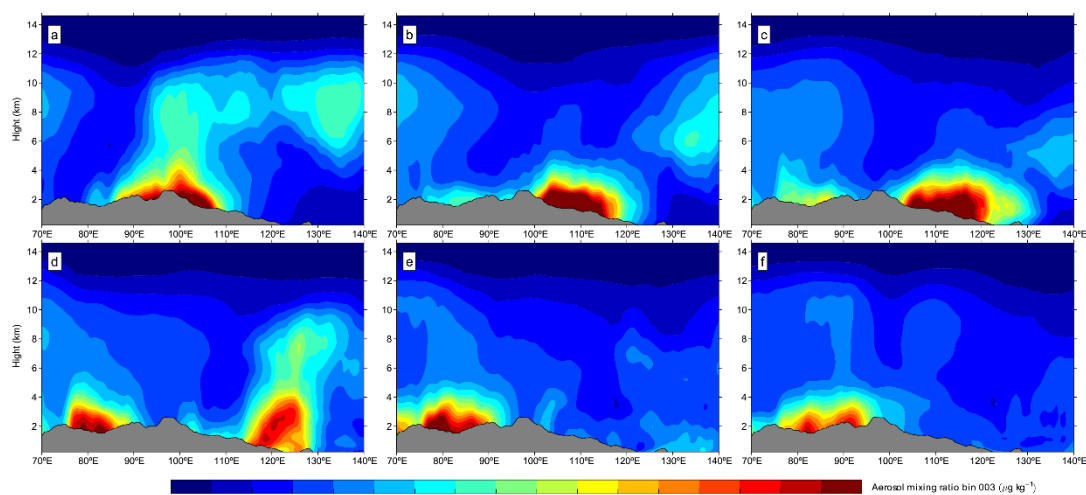

**Figure S6.** Vertical profile characteristics of dust aerosol mixing ratio of bin-003 accumulated in the atmosphere on a single day on 2–7 May 2017. (sub-graph (a) to (f) respectively describe dust aerosol mixing ratio of bin-003 on 2–7 May 2017)

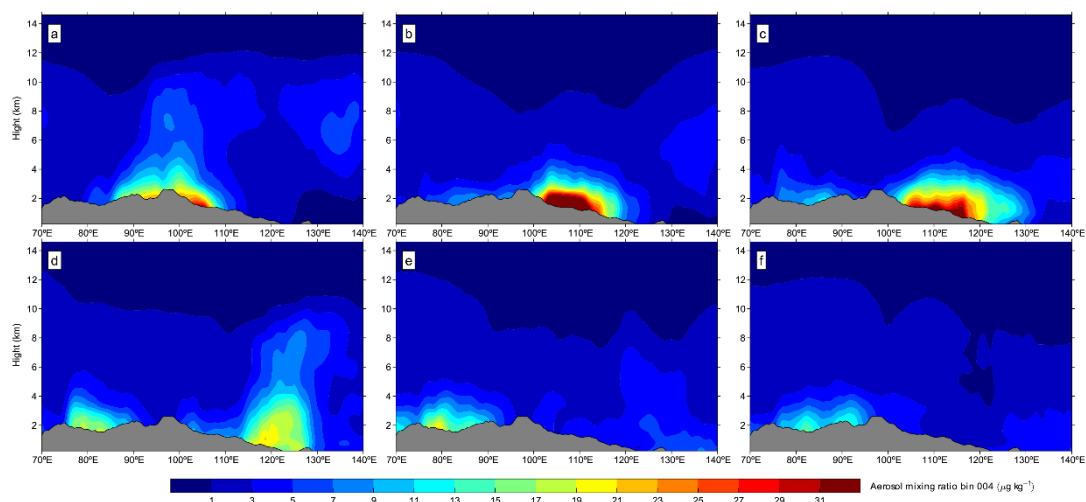

**Figure S7.** Vertical profile characteristics of dust aerosol mixing ratio of bin-004 accumulated in the atmosphere on a single day on 2–7 May 2017. (sub-graph (a) to (f) respectively describe dust aerosol mixing ratio of bin-004 on 2–7 May 2017)

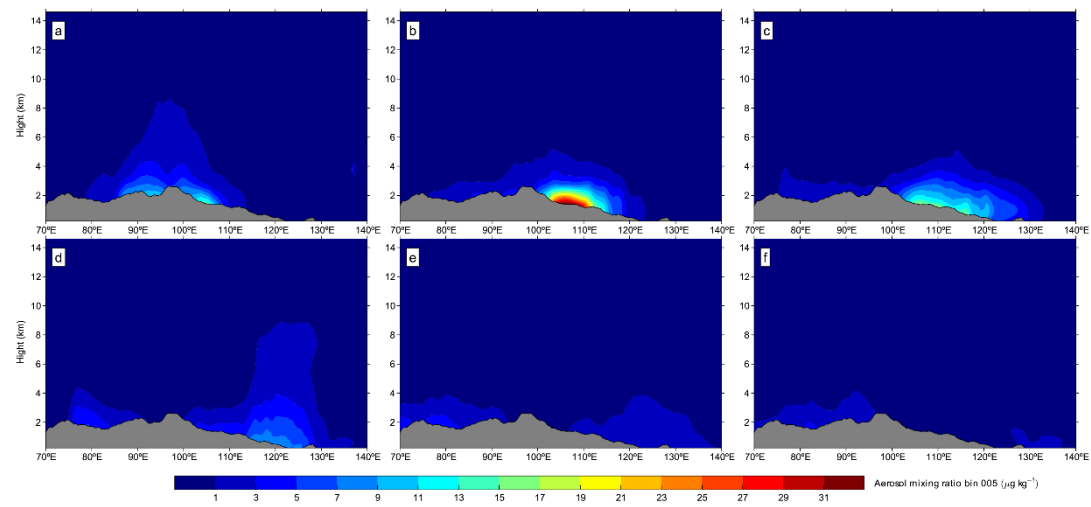

**Figure S8.** Vertical profile characteristics of dust aerosol mixing ratio of bin-005 accumulated in the atmosphere on a single day on 2–7 May 2017. (sub-graph (a) to (f) respectively describe dust aerosol mixing ratio of bin-005 on 2–7 May 2017)
